# Supplementary material
Source: Springer Nature journal article supplement (https://www.springermedizin.de/resource/supplementary/12882_2013_606_MOESM4_ESM.pdf/9453924)
Supplement: MOESM4 [file 9453924]

Number invited to participate in the study from 220 randomly selected households

n=6698

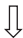

Response rate 74% (n=4957)

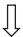

ACR assay  $\geq 30$  mg/g on two occasions  
and satisfy other criteria of CKDu  
(n=733)

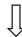

No diabetes, other kidney  
disease, CKDu and snake bite=4044  
(excluded=180, missing data n=25)

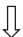

Urine arsenic, cadmium and lead n=495

n=132

Urine for other elements n=107

n=0

Serum selenium, strontium etc n=171

n=0

Hair/nails arsenic, cadmium lead n=80

n=48

Urine pesticide residues n=57

n=0
